# Supplementary material for: Low temperature sintering process of copper fine particles under nitrogen gas flow with Cu2+-alkanolamine metallacycle compounds for electrically conductive layer formation
Source: Royal Society of Chemistry journal article supplement (doi:10.1039/c5ra25058g), 2016-01-01
Supplement: c5ra25058g1.pdf [file c5ra25058g1.pdf]

Supporting Information  
for

**Low temperature sintering process of copper fine particles under nitrogen gas flow with  $\text{Cu}^{2+}$ -alkanolamine metallacycle compounds for electrically conductive layer formation**

Tetsu Yonezawa,\* Hiroki Tsukamoto, Yingqiong Yong, Mai Thanh Nguyen, and Masaki Matsubara  
*Division of Materials Science and Engineering, Faculty of Engineering, Hokkaido University,  
Kita 13 Nishi 8, Kita-ku, Sapporo, Hokkaido 060-8628, Japan*

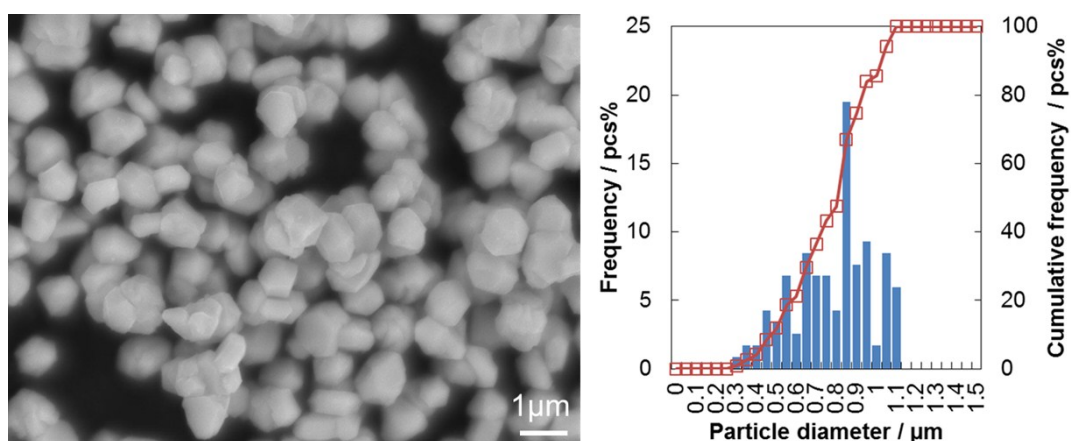

**Figure S1.** SEM image and particle distribution of copper particle added to the ink with median sizes of 0.8 μm.

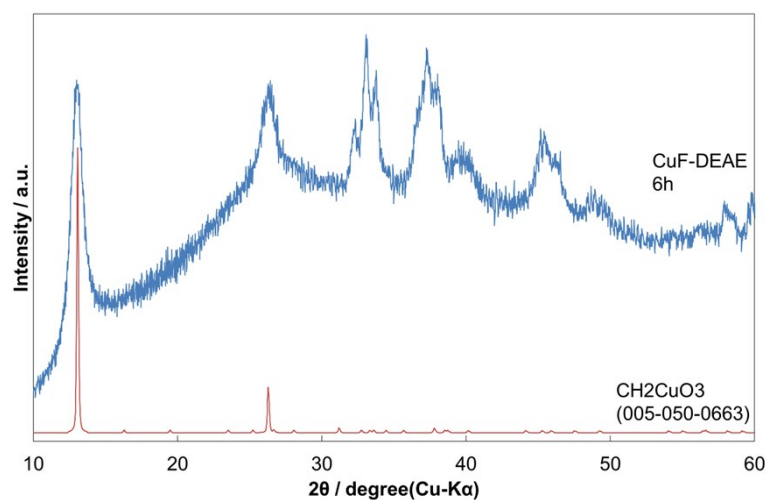

**Figure S2.** X-ray diffraction patterns of crystallized compound generated from CuF-DEAE complexes and copper formate hydroxide (JCPDS 005-050-0663).

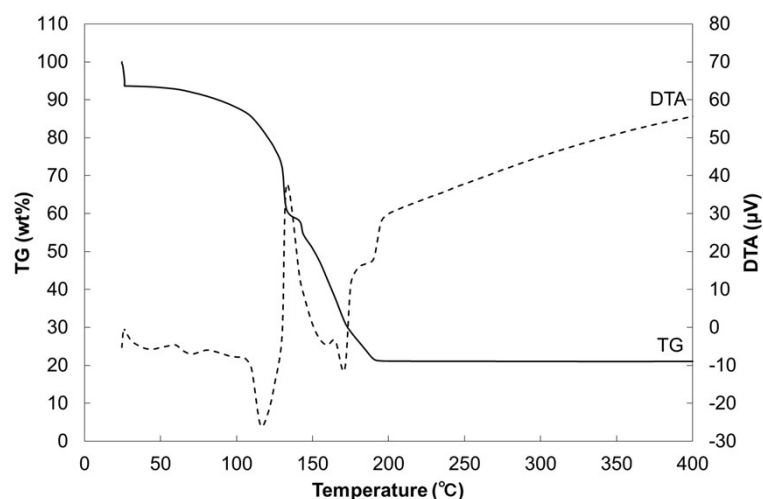

**Figure S3.** DTA-TGA results of CuF-IPA complex prepared using CuF and IPA with the molar ratios of 1:1 (mol/mol) under N<sub>2</sub> flow of 100 cm<sup>3</sup> min<sup>-1</sup>. The heating rate was fixed to 5 °C min<sup>-1</sup>.

The decomposition processes of CuF-IPA complex prepared using molar ratios of 1:1 CuF to IPA were studied using TGA-DTA. The complex began to decompose at lower than 100 °C. The exothermic peak at 133-134 °C corresponded to the release of CO<sub>2</sub> in the first step decomposition of the CuF.
